# Supplementary material for: Prevalence and antibiotic resistance of bacterial pathogens isolated from childhood diarrhea in Beijing, China (2010–2014)
Source: Gut Pathog. 2016 Jun 13;8:31. doi: 10.1186/s13099-016-0116-2 (PMC4906916; doi:10.1186/s13099-016-0116-2)
Supplement: Supplementary file 2 — 10.1186/s13099-016-0116-2 Basic information and antimicrobial resistance of all strains isolated from diarrheal children. [file 13099_2016_116_MOESM2_ESM.xls]

## Sheet: new
isolate ID	species	serotype	sex	age	year	month	AMP	CHL	CIP	CRO	GEN	NAL	STR	SUL	TET
2010SM004	Salmonella	S. Enteritidis	male	2.02053	2010	5	R	R	S	R	S	R	R	R	R
2010SM027	Salmonella	S. Typhimurium	male	0.750171	2010	6	S	S	S	S	S	S	S	I	S
2010SM040	Salmonella	S. Victoria	male	3.8987	2010	7	S	S	S	S	S	R	S	S	S
2010SM049	Salmonella	S. Paratyphi C	female	0.544832	2010	8	S	S	S	S	S	S	I	R	S
2010SM062	Salmonella	S. Typhi	male	0.591376	2010	8	S	S	S	S	S	R	S	S	S
2010SM069	Salmonella	S. Bareilly	female	0.635181	2010	8	S	S	S	S	S	I	I	S	S
2010SM070	Salmonella	S. Typhimurium	male	0.698152	2010	8	R	S	S	S	S	S	R	R	R
2010SM079	Salmonella	S. Agona	male	1.36071	2010	9	S	S	S	S	S	S	S	S	S
2010SM081	Salmonella	S. Braenderup	female	3.75633	2010	10	S	S	S	S	S	R	S	I	S
2010SM084	Salmonella	S. Paratyphi C	male	4.7447	2010	8	S	S	S	S	S	S	S	I	S
2010SM085	Salmonella	S. Montevideo	female	0.580424	2010	7	S	S	I	S	S	S	S	R	S
2011SM002	Salmonella	S. Papuana	female	1.31964	2011	1	S	S	S	S	S	R	I	R	S
2011SM007	Salmonella	S. Typhimurium	female	1	2011	4	R	S	S	S	S	S	R	R	R
2011SM030	Salmonella	S. Paratyphi C	female	2.0835	2011	6	S	S	S	S	S	S	I	S	S
2011SM031	Salmonella	S. Agona	male	1	2011	6	S	S	S	S	S	S	S	S	S
2011SM033	Salmonella	S. Paratyphi C	female	0.555784	2011	6	S	S	S	S	S	S	I	I	S
2011SM034	Salmonella	S. Typhimurium	male	0.646133	2011	6	R	R	S	S	R	R	R	R	S
2011SM056	Salmonella	S. Derby	male	3	2011	8	S	S	S	S	S	S	S	S	S
2011SM076	Salmonella	S. Blegdam	male	0.720055	2011	10	S	S	S	S	S	R	I	I	S
2012SM001	Salmonella	S. Aerdeen	male	0.988364	2012	1	S	I	I	S	S	S	S	S	S
2012SM002	Salmonella	S. Enteritidis	male	2.59001	2012	2	S	I	I	S	S	R	S	S	S
2012SM004	Salmonella	S. Tennessee	male	1.68104	2012	3	S	I	S	S	S	S	R	R	S
2012SM013	Salmonella	S. Agona	male	1.95209	2012	4	S	R	S	S	S	S	S	S	S
2012SM014	Salmonella	S. Enteritidis	female	1.00205	2012	4	I	I	I	S	S	R	S	R	S
2012SM015	Salmonella	S. Enteritidis	female	0.366872	2012	4	S	R	I	S	S	R	S	R	S
2012SM021	Salmonella	S. Enteritidis	female	2.2642	2012	5	S	I	I	S	S	R	S	R	S
2012SM022	Salmonella	S. Enteritidis	female	0.386037	2012	5	R	S	I	S	S	R	R	R	I
2012SM026	Salmonella	S. Infantis	female	1.2512	2012	5	R	R	I	S	S	R	S	R	R
2012SM029	Salmonella	S. Enteritidis	female	0.750171	2012	4	R	S	S	R	S	R	S	S	S
2012SM039	Salmonella	S. Agona	male	1.22656	2012	5	S	I	S	S	S	S	S	S	S
2012SM088	Salmonella	S. Enteritidis	male	2.23956	2012	5	S	S	I	S	S	R	S	S	S
2012SM091	Salmonella	S. Senftenberg	male	1.18823	2012	6	S	I	I	S	S	R	R	R	S
2012SM096	Salmonella	S. Stanley	female	3.12115	2012	5	S	I	S	S	S	S	S	R	S
2012SM119	Salmonella	S. Enteritidis	male	0.952772	2012	7	R	I	I	S	S	R	R	R	S
2012SM123	Salmonella	1,4,[5],12:i:-	male	0.837782	2012	7	R	R	R	S	R	R	R	R	R
2012SM124	Salmonella	S. Enteritidis	male	5.38809	2012	7	R	S	I	S	S	R	R	R	R
2012SM137	Salmonella	S. Tennessee	male	1.50582	2012	7	I	I	I	S	S	R	R	R	R
2012SM144	Salmonella	1,4,[5],12:i:-	female	0.892539	2012	7	R	I	S	S	S	S	R	R	R
2012SM152	Salmonella	S. Bovismorbificans	male	0.862423	2012	8	S	I	S	S	S	S	R	R	S
2012SM153	Salmonella	S. Typhimurium	female	0.514716	2012	8	R	R	R	S	R	R	R	R	S
2012SM154	Salmonella	S. Typhimurium	female	0.506502	2012	8	R	R	R	S	R	R	R	R	S
2012SM170	Salmonella	S. Enteritidis	male	0.793977	2012	8	R	S	I	S	R	R	S	R	I
2012SM172	Salmonella	1,4,[5],12:i:-	male	4.76386	2012	9	R	I	S	S	S	S	R	R	R
2012SM175	Salmonella	S. Meleagridis	male	0.769336	2012	8	S	S	S	S	S	S	S	R	S
2012SM181	Salmonella	S. Ferruch	male	0.350445	2012	9	S	S	S	S	S	S	S	R	S
2012SM186	Salmonella	S. Enteritidis	female	2.42847	2012	10	S	S	S	S	S	R	S	S	S
2012SM190	Salmonella	S. Agona	female	1.30048	2012	10	S	I	S	S	S	S	R	R	S
2012SM191	Salmonella	1,4,[5],12:i:-	male	1.22656	2012	10	S	S	S	S	S	S	S	S	R
2012SM196	Salmonella	S. Enteritidis	female	3.05544	2012	11	R	I	I	S	S	R	R	R	R
2013SM016	Salmonella	S. Typhimurium	male	1.80698	2013	4	S	S	I	S	S	R	S	S	S
2013SM020	Salmonella	1,4,[5],12:i:-	female	1.6564	2013	5	R	R	R	S	S	R	R	R	S
2013SM021	Salmonella	S. Typhimurium	female	0.76386	2013	5	R	I	R	S	S	R	R	S	R
2013SM025	Salmonella	S. Singapore	male	1.21834	2013	5	S	I	S	S	S	S	S	R	S
2013SM036	Salmonella	S. Hvittingfoss	male	0.87885	2013	6	S	I	S	S	S	S	S	R	S
2013SM037	Salmonella	S. Livingstone	male	5.13073	2013	6	S	I	S	S	S	S	S	S	S
2013SM038	Salmonella	S. Enteritidis	female	1.00753	2013	5	R	S	I	S	S	R	S	R	S
2013SM056	Salmonella	1,4,[5],12:i:-	male	0.687201	2013	7	R	R	S	R	R	R	R	R	R
2013SM075	Salmonella	1,4,[5],12:i:-	male	0.908966	2013	7	S	S	S	S	S	S	R	S	R
2013SM085	Salmonella	S. Enteritidis	female	2.51335	2013	8	R	I	I	S	S	R	R	R	S
2013SM089	Salmonella	S. Enteritidis	male	0.610541	2013	7	S	S	I	S	S	R	S	S	S
2013SM092	Salmonella	1,4,[5],12:i:-	male	0.0958248	2013	8	R	S	S	S	S	S	R	S	R
2013SM093	Salmonella	S. Enteritidis	male	0.646133	2013	8	S	S	I	S	S	R	S	S	S
2013SM094	Salmonella	S. Virchow	male	4.87885	2013	8	R	R	I	S	S	R	R	S	R
2013SM112	Salmonella	S. Brunei	male	1.15811	2013	9	S	S	S	S	S	S	S	S	S
2013SM113	Salmonella	S. Infantis	male	0.76386	2013	9	R	I	I	R	S	S	R	R	S
2013SM114	Salmonella	S. Winston II	female	1.38261	2013	8	R	I	S	S	S	S	R	R	R
2013SM121	Salmonella	1,4,[5],12:i:-	male	1.62355	2013	8	R	I	S	S	S	S	R	R	R
2013SM127	Salmonella	S. Agona	male	0.596851	2013	10	R	I	I	S	R	R	R	R	R
2013SM128	Salmonella	S. Enteritidis	male	0.684463	2013	10	R	I	I	S	S	R	R	R	S
2013SM129	Salmonella	S. Enteritidis	female	1.63176	2013	10	R	S	I	S	R	R	S	R	I
2013SM130	Salmonella	S. Enteritidis	male	4.53388	2013	10	S	I	S	S	S	S	S	R	S
2013SM131	Salmonella	1,4,[5],12:i:-	male	1.41547	2013	10	R	I	S	S	S	S	R	R	S
2013SM148	Salmonella	S. Infantis	male	1.91923	2013	10	R	I	I	S	S	R	S	R	S
2013SM150	Salmonella	S. Enteritidis	male	1.02396	2013	10	S	I	I	S	S	R	S	S	S
2013SM151	Salmonella	S. Enteritidis	female	1.63997	2013	11	R	I	I	S	S	R	R	R	S
2014SM001	Salmonella	S. Enteritidis	male	1.11157	2014	1	S	S	I	S	S	R	S	S	S
2014SM005	Salmonella	S. Typhimurium	male	2.03422	2014	3	R	R	I	S	S	S	R	R	R
2014SM006	Salmonella	S. Agona	male	1.9384	2014	4	S	I	S	S	S	S	S	S	S
2014SM007	Salmonella	S. Enteritidis	male	0.947296	2014	4	R	S	I	R	S	R	R	R	S
2014SM008	Salmonella	S. Enteritidis	male	0.911704	2014	4	R	S	I	S	S	R	R	S	S
2014SM009	Salmonella	S. Enteritidis	male	2.06434	2014	4	R	S	I	R	S	R	R	S	S
2014SM027	Salmonella	S. Braenderup	male	0.982888	2014	4	S	S	I	S	S	R	S	S	S
2014SM028	Salmonella	S. Enteritidis	male	2.16564	2014	4	R	R	I	R	S	R	S	S	S
2014SM029	Salmonella	S. Enteritidis	male	1.64545	2014	5	R	S	I	S	S	R	R	R	R
2014SM030	Salmonella	S. Paratyhi B	male	1.86448	2014	5	S	I	S	S	S	S	S	S	S
2014SM035	Salmonella	S. Dublin	male	1.68104	2014	5	R	S	I	S	S	R	R	R	S
2014SM039	Salmonella	1,4,[5],12:i:-	female	0.648871	2014	6	R	I	I	R	S	R	R	S	R
2014SM045	Salmonella	S. Sterrenbos	male	1.18001	2014	7	S	I	S	S	S	S	S	R	S
2014SM047	Salmonella	S. Typhimurium	female	1.25394	2014	7	R	R	R	S	R	R	R	R	R
2014SM051	Salmonella	S. Typhimurium	male	0.328542	2014	6	R	R	R	I	R	R	S	R	R
2014SM055	Salmonella	1,4,[5],12:i:-	male	1.54689	2014	8	R	I	S	S	S	S	R	R	R
2014SM056	Salmonella	S. Thompson	female	3.0883	2014	8	S	I	S	S	S	S	S	S	S
2014SM058	Salmonella	S. Enteritidis	female	1.38535	2014	8	S	S	I	S	S	R	S	S	S
2014SM060	Salmonella	S. Enteritidis	female	0.629706	2014	6	R	S	R	R	R	R	R	R	R
2014SM062	Salmonella	S. Typhimurium	female	1.68925	2014	7	R	R	I	S	S	S	R	R	R
2014SM064	Salmonella	S. Enteritidis	male	1.29774	2014	7	R	S	I	R	S	R	R	S	R
2014SM066	Salmonella	1,4,[5],12:i:-	male	1.89185	2014	8	R	R	R	S	R	R	R	R	S
2014SM077	Salmonella	S. Litchfield	male	0.158795	2014	7	S	S	I	S	S	S	R	S	S
2014SM081	Salmonella	S. Enteritidis	female	0.780287	2014	8	S	I	I	S	S	R	S	S	S
2014SM089	Salmonella	S. Typhimurium	male	0.287474	2014	7	R	I	I	S	R	R	R	R	R
2014SM091	Salmonella	S. Agona	female	1.76591	2014	9	S	I	S	S	S	S	S	S	S
2014SM095	Salmonella	S. Enteritidis	male	2.08898	2014	9	R	S	I	S	S	R	R	S	S
2014SM106	Salmonella	S. Typhimurium	male	0.427105	2014	8	R	R	R	S	R	R	S	R	R
2014SM110	Salmonella	S. Manhattan	female	2.00684	2014	9	S	I	S	S	S	S	S	S	S
2014SM117	Salmonella	S. Typhimurium	male	0.95551	2014	10	S	I	S	S	S	S	S	R	R
2014SM118	Salmonella	S. Enteritidis	male	1.08693	2014	10	R	S	I	S	S	R	S	R	R
2014SM123	Salmonella	S. Enteritidis	female	3.04723	2014	10	S	S	I	S	S	R	S	S	S
2014SM124	Salmonella	S. Agona	male	0.884326	2014	12	S	I	S	S	S	S	S	S	S
2014SM125	Salmonella	S. Agona	male	1.07871	2014	12	S	I	S	S	S	S	S	S	S
2010ZH018	Shigella	S. sonnei	male	1.51677	2010	7	R	S	R	S	R	S	S	R	S
2010ZH042	Shigella	S. sonnei	female	1.859	2010	7	R	S	I	S	R	S	S	R	S
2010ZH044	Shigella	S. sonnei	male	2.38467	2010	7	R	S	I	S	R	S	S	R	S
2010ZH052	Shigella	S. sonnei	male	2.61739	2010	8	R	R	I	S	R	S	S	R	S
2010ZH056	Shigella	S. sonnei	male	4	2010	8	R	R	I	S	R	S	S	R	S
2010ZH095	Shigella	S. sonnei	male	5.80972	2010	8	R	R	I	S	I	S	S	R	S
2010ZH103	Shigella	S. sonnei	male	1.4976	2010	8	R	R	I	S	R	S	S	R	S
2010ZH123	Shigella	S. sonnei	male	5.95483	2010	8	R	R	I	S	I	S	S	R	S
2010ZH128	Shigella	S. sonnei	male	2.70773	2010	8	R	R	I	S	R	I	S	S	S
2010ZH136	Shigella	S. sonnei	male	1.75496	2010	8	R	S	I	S	R	R	S	R	S
2010ZH137	Shigella	S. sonnei	male	3.32923	2010	9	R	S	S	S	R	S	S	R	S
2010ZH169	Shigella	S. sonnei	female	5.82067	2010	8	R	R	I	S	I	S	S	R	S
2010ZH170	Shigella	S. sonnei	male	1.42916	2010	8	R	R	I	S	R	R	S	R	S
2010ZH285	Shigella	S. flexneri4C	male	4.54757	2010	10	R	S	R	S	R	S	S	S	S
2010ZH291	Shigella	S. sonnei	female	4.13142	2010	10	R	S	I	S	R	S	S	R	S
2011ZH002	Shigella	S. sonnei	female	1.24298	2011	6	R	R	I	S	R	S	S	R	S
2011ZH003	Shigella	S. sonnei	female	0.175222	2011	6	R	R	I	S	R	S	S	R	S
2011ZH017	Shigella	S. sonnei	male	5.31964	2011	7	R	R	R	S	I	S	S	R	S
2011ZH021	Shigella	S. sonnei	male	5.67556	2011	7	R	R	I	S	I	S	S	R	S
2011ZH027	Shigella	S. sonnei	female	4.1232	2011	7	R	R	I	S	I	S	S	R	S
2011ZH033	Shigella	S. sonnei	female	1.32238	2011	8	R	S	S	S	I	S	S	R	S
2011ZH034	Shigella	S. sonnei	male	4.71184	2011	8	R	R	S	S	R	S	S	R	S
2011ZH047	Shigella	S. sonnei	female	2	2011	8	R	S	S	S	R	S	S	R	S
2011ZH053	Shigella	S. sonnei	male	1	2011	8	R	S	S	S	I	S	S	R	S
2011ZH058	Shigella	S. sonnei	male	3.64956	2011	8	R	S	S	S	I	S	S	R	S
2011ZH059	Shigella	S. sonnei	female	1.60986	2011	9	I	S	S	S	S	S	S	S	S
2011ZH064	Shigella	S. sonnei	female	0.958248	2011	8	R	S	I	S	I	S	S	R	S
2011ZH207	Shigella	S. sonnei	female	2.34086	2011	9	R	S	S	S	I	S	S	R	S
2011ZH214	Shigella	S. flexneri 4c	male	2.52704	2011	9	R	S	R	S	R	S	S	S	S
2012ZH004	Shigella	S. flexneri 2a	male	5.295	2012	7	R	S	R	S	R	S	S	S	S
2012ZH009	Shigella	S. sonnei	male	5.57153	2012	8	R	S	I	S	I	R	S	R	S
2012ZH010	Shigella	S. flexneri 2a	male	1.87269	2012	8	R	S	R	R	R	S	S	S	S
2012ZH022	Shigella	S. sonnei	male	0.651608	2012	8	R	S	I	S	I	S	S	R	S
2013ZH008	Shigella	S. sonnei	male	3.61123	2013	6	R	R	I	S	R	S	S	R	S
2013ZH054	Shigella	S. sonnei	male	3.58385	2013	8	R	R	S	S	I	S	S	R	S
2014ZH024	Shigella	S. dysenteriae 2	male	0.517454	2014	8	S	S	S	S	R	S	S	S	S
2014ZH025	Shigella	S. sonnei	male	0.599589	2014	8	R	S	S	S	R	S	S	R	S
2010JZ207	Diarrheagenic E.coli	ETEC	male	1.1718	2010	10
2010JZ054	Diarrheagenic E.coli	EPEC	female	0.643395	2010	7
2010JZ025	Diarrheagenic E.coli	ETEC	female	1.39357	2010	6
2010JZ206	Diarrheagenic E.coli	EPEC	female	0.695414	2010	9
2010JZ001	Diarrheagenic E.coli	EPEC	male	0.50924	2010	4
2010JZ107	Diarrheagenic E.coli	ETEC	male	0.714579	2010	7
2010JZ024	Diarrheagenic E.coli	EPEC	male	0.947296	2010	6
2010JZ002	Diarrheagenic E.coli	EPEC	female	0.706366	2010	6
2010JZ122	Diarrheagenic E.coli	EPEC	female	0.769336	2010	8
2010JZ110	Diarrheagenic E.coli	EPEC	female	0.50924	2010	7
2010JZ111	Diarrheagenic E.coli	EPEC	female	0.418891	2010	7
2011JZ005	Diarrheagenic E.coli	EPEC	female	1	2011	4
2011JZ006	Diarrheagenic E.coli	ETEC	female	1	2011	5
2011JZ025	Diarrheagenic E.coli	EPEC	female	2	2011	6
2011JZ071	Diarrheagenic E.coli	EPEC	male	0.833333	2011	7
2011JZ208	Diarrheagenic E.coli	EPEC	male	1	2011	8
2011JZ209	Diarrheagenic E.coli	EIEC	male	1	2011	8
2011JZ210	Diarrheagenic E.coli	EPEC	male	2	2011	8
2011JZ213	Diarrheagenic E.coli	EPEC	female	0.5	2011	8
2011JZ344	Diarrheagenic E.coli	EPEC	male	0.832307	2011	11
2011JZ104	Diarrheagenic E.coli	ETEC	male	1.80424	2011	7
2011JZ110	Diarrheagenic E.coli	ETEC	female	1.64545	2011	7
2011JZ088	Diarrheagenic E.coli	EPEC	male	1.07598	2011	6
2011JZ339	Diarrheagenic E.coli	EPEC	male	1.23751	2011	11
2011JZ021	Diarrheagenic E.coli	EPEC	female	2.36277	2011	5
2011JZ008	Diarrheagenic E.coli	EPEC	female	0.714579	2011	5
2011JZ020	Diarrheagenic E.coli	EPEC	male	1.35797	2011	5
2011JZ056	Diarrheagenic E.coli	EPEC	female	1.24298	2011	6
2011JZ150	Diarrheagenic E.coli	EPEC	female	1.36619	2011	7
2012JZ087	Diarrheagenic E.coli	EPEC	female	1.2512	2012	5
2012JZ344	Diarrheagenic E.coli	EPEC	male	0.898015	2012	7
2012JZ129	Diarrheagenic E.coli	EPEC	male	1.19644	2012	5
2012JZ347	Diarrheagenic E.coli	EAEC	male	1.12252	2012	7
2012JZ346	Diarrheagenic E.coli	ETEC	male	1.79329	2012	7
2012JZ480	Diarrheagenic E.coli	EIEC	male	2.49966	2012	8
2012JZ375	Diarrheagenic E.coli	EPEC	female	0.944559	2012	7
2012JZ084	Diarrheagenic E.coli	EPEC	male	0.77755	2012	4
2012JZ216	Diarrheagenic E.coli	EPEC	male	0.353183	2012	6
2012JZ020	Diarrheagenic E.coli	EPEC	female	2.141	2012	2
2012JZ042	Diarrheagenic E.coli	EPEC	male	0.325804	2012	3
2012JZ624	Diarrheagenic E.coli	EPEC	male	0.544832	2012	10
2012JZ542	Diarrheagenic E.coli	ETEC	female	4.9473	2012	9
2012JZ633	Diarrheagenic E.coli	EPEC	male	0.574949	2012	10
2012JZ130	Diarrheagenic E.coli	ETEC	male	1.1718	2012	5
2012JZ497	Diarrheagenic E.coli	EAEC	female	0.377823	2012	8
2012JZ379	Diarrheagenic E.coli	ETEC	female	2.90486	2012	7
2012JZ141	Diarrheagenic E.coli	EPEC	male	1.05133	2012	6
2012JZ342	Diarrheagenic E.coli	EPEC	male	0.780287	2012	7
2012JZ393	Diarrheagenic E.coli	EAEC	male	0.963723	2012	7
2013DE126	Diarrheagenic E.coli	EPEC	female	4.85147	2013	8
2013DE140	Diarrheagenic E.coli	ETEC	male	3.91786	2013	9
2013DE048	Diarrheagenic E.coli	ETEC	female	2.07529	2013	6
2013DE101	Diarrheagenic E.coli	EPEC	female	0.678987	2013	8
2013DE027	Diarrheagenic E.coli	EPEC	male	1.81793	2013	5
2013DE176	Diarrheagenic E.coli	EPEC	male	1.07871	2013	10
2013DE178	Diarrheagenic E.coli	EAEC	female	1.04586	2013	11
2013DE081	Diarrheagenic E.coli	EAEC	male	2.28063	2013	7
2013DE071	Diarrheagenic E.coli	STEC	male	2.27242	2013	6
2013DE159	Diarrheagenic E.coli	EPEC	female	1.06776	2013	10
2013DE013	Diarrheagenic E.coli	EPEC	male	1.96304	2013	5
2013DE164	Diarrheagenic E.coli	EAEC	male	1.03491	2013	10
2013DE163	Diarrheagenic E.coli	EPEC	male	1.07598	2013	10
2013DE010	Diarrheagenic E.coli	EPEC	male	0.106776	2013	5
2013DE105	Diarrheagenic E.coli	EAEC	male	1.19097	2013	8
2013DE104	Diarrheagenic E.coli	EPEC	male	0.906229	2013	8
2013DE184	Diarrheagenic E.coli	EPEC	male	0.643395	2013	12
2013DE093	Diarrheagenic E.coli	EPEC	female	1.53593	2013	7
2013DE154	Diarrheagenic E.coli	EPEC	female	1.4538	2013	9
2014DE001	Diarrheagenic E.coli	ETEC	male	0.758385	2014	1
2014DE212	Diarrheagenic E.coli	EPEC	male	0.930869	2014	12
2014DE014	Diarrheagenic E.coli	EPEC	male	2.09172	2014	5
2014DE073	Diarrheagenic E.coli	EAEC	male	1.46201	2014	7
2014DE081	Diarrheagenic E.coli	ETEC	male	4.59685	2014	6
2014DE174	Diarrheagenic E.coli	EIEC	female	0.62423	2014	8
2014DE196	Diarrheagenic E.coli	EAEC	male	0.900753	2014	10
2014DE188	Diarrheagenic E.coli	EAEC	male	0.443532	2014	9
2014DE074	Diarrheagenic E.coli	EAEC	female	1.25394	2014	7
2014DE164	Diarrheagenic E.coli	EPEC	female	0.780287	2014	8
2014DE117	Diarrheagenic E.coli	EPEC	female	2.43121	2014	6
2014DE115	Diarrheagenic E.coli	EPEC	male	0.47091	2014	8
2014DE023	Diarrheagenic E.coli	EAEC	male	1.04312	2014	5
2014DE153	Diarrheagenic E.coli	EPEC	male	0.673511	2014	8
2014DE017	Diarrheagenic E.coli	EAEC	male	0.43258	2014	5
2014DE070	Diarrheagenic E.coli	EPEC	female	0.887064	2014	6
2014DE047	Diarrheagenic E.coli	EAEC	male	0.476386	2014	5
2014DE094	Diarrheagenic E.coli	EPEC	female	0.391513	2014	7
2014DE095	Diarrheagenic E.coli	EAEC	female	0.391513	2014	7
2014DE211	Diarrheagenic E.coli	EAEC	male	1.16085	2014	11
2014DE184	Diarrheagenic E.coli	EPEC	male	1.18549	2014	9
2014DE010	Diarrheagenic E.coli	EPEC	male	0.616016	2014	4
2014DE016	Diarrheagenic E.coli	EPEC	male	2.01232	2014	5
2014DE003	Diarrheagenic E.coli	EAEC	male	0.536619	2014	1
2014DE119	Diarrheagenic E.coli	EPEC	female	2.51882	2014	6
2014DE203	Diarrheagenic E.coli	EPEC	male	1.29774	2014	10
2014DE173	Diarrheagenic E.coli	EIEC	male	0.646133	2014	8
2014DE025	Diarrheagenic E.coli	EPEC	male	2.31075	2014	5
2014DE192	Diarrheagenic E.coli	EPEC	female	0.323066	2014	9
2014DE052	Diarrheagenic E.coli	EPEC	female	1.07324	2014	6
2014DE027	Diarrheagenic E.coli	EIEC	female	2.88022	2014	6
2014DE142	Diarrheagenic E.coli	EAEC	female	0.410678	2014	8
2014DE197	Diarrheagenic E.coli	EAEC	female	0.996578	2014	10
2014DE200	Diarrheagenic E.coli	EAEC	male	1.93566	2014	10
2014DE204	Diarrheagenic E.coli	EPEC	male	0.837782	2014	10
2014DE085	Diarrheagenic E.coli	EAEC	male	1.15537	2014	7
2014DE072	Diarrheagenic E.coli	EAEC	female	1.10883	2014	7
2014DE067	Diarrheagenic E.coli	EPEC	female	0.465435	2014	6
2014DE026	Diarrheagenic E.coli	ETEC	male	2.75428	2014	6
2014DE002	Diarrheagenic E.coli	ETEC	male	2.60917	2014	1
2014DE093	Diarrheagenic E.coli	EPEC	female	0.977413	2014	7
2014DE005	Diarrheagenic E.coli	EAEC	male	0.977413	2014	3
2014DE131	Diarrheagenic E.coli	EAEC	male	1.56879	2014	7
2014DE185	Diarrheagenic E.coli	EAEC	male	0.5859	2014	9
2014DE028	Diarrheagenic E.coli	EPEC	male	0.996578	2014	6
2014DE139	Diarrheagenic E.coli	ETEC	female	5.30595	2014	8
2014DE195	Diarrheagenic E.coli	EAEC	female	0.621492	2014	10
2014DE205	Diarrheagenic E.coli	EAEC	male	3.45243	2014	10
2014DE209	Diarrheagenic E.coli	EPEC	male	1.05407	2014	11
2014DE086	Diarrheagenic E.coli	EAEC	female	0.632444	2014	7
2010JZ205	V. parahaemolyticus	O3:K6	female	0.766598	2010	10
2010JZ158	V. parahaemolyticus	O3:K6	female	2.83641	2010	8
2010JZ020	V. parahaemolyticus	O3:KUT	female	0.520192	2010	5
2010JZ113	V. parahaemolyticus	O3:K6	female	0.9	2010	8
2011JZ133	V. parahaemolyticus	O1:KUT	male	0.881588	2011	7
2011JZ245	V. parahaemolyticus	O3:K6	male	0.339493	2011	8
2012JZ321	V. parahaemolyticus	O3:K6	male	1.00753	2012	7
2012JZ484	V. parahaemolyticus	O3:K6	female	1.54962	2012	8
2013PV163	V. parahaemolyticus	O3:K6	female	0.531143	2013	9
2014VP082	V. parahaemolyticus	O3:K6	female	1.35797	2014	9
